# Supplementary material for: Federal Institutions and Strategic Policy Responses to COVID-19 Pandemic
Source: Frontiers journal article supplement (doi:10.3389/fpos.2021.631363), 2021-06-22
Supplement: Table_1.pdf [file Table_1.pdf]

# Federal Institutions and Strategic Policy Responses to COVID-19

Pandemic:

## Supplementary Information

Olga Shvetsova,\* Binghamton University, [shvetso@binghamton.edu](mailto:shvetso@binghamton.edu)

Julie VanDusky-Allen, Boise State

University, [julievanduskyallen@boisestate.edu](mailto:julievanduskyallen@boisestate.edu)

Andrei Zhirnov, University of Exeter, [A.Zhirnov@exeter.ac.uk](mailto:A.Zhirnov@exeter.ac.uk)

Abdul Basit Adeel, Binghamton University, [aadeel1@binghamton.edu](mailto:aadeel1@binghamton.edu)

Michael Catalano, Binghamton University, [mcatala4@binghamton.edu](mailto:mcatala4@binghamton.edu)

Olivia Catalano, M.S., [olivia.catalano15@gmail.com](mailto:olivia.catalano15@gmail.com)

Frank Giannelli, Rutgers, The State University of New Jersey,

[giannefr@shp.rutgers.edu](mailto:giannefr@shp.rutgers.edu)

Ezgi Muftuoglu, Binghamton University, [emuftuo1@binghamton.edu](mailto:emuftuo1@binghamton.edu)

Dina Rosenberg, Higher School of Economics [balalaeva@gmail.com](mailto:balalaeva@gmail.com)

Mehmet Halit Sezgin, Binghamton University, [halitsezgin@gmail.com](mailto:halitsezgin@gmail.com)

Tianyi Zhao, Binghamton University, [tzhao19@binghamton.edu](mailto:tzhao19@binghamton.edu)

## S1. Categories included in PPI

| Category                                                    | Var_name         | Values                                                      | Max.<br>value in<br>category | Weight<br>in<br>index,<br>% |
|-------------------------------------------------------------|------------------|-------------------------------------------------------------|------------------------------|-----------------------------|
| 1. International<br>and domestic<br>air borders<br>closure  | <b>air_bord</b>  | All air borders are closed (3)                              | 3                            | 7.5                         |
|                                                             |                  | All international air borders are closed (2)                |                              |                             |
|                                                             |                  | Air borders with select countries are closed (1)            |                              |                             |
|                                                             |                  | All air borders are open (0)                                |                              |                             |
| 2. International<br>and domestic<br>land borders<br>closure | <b>land_bord</b> | All land borders are closed (3)                             | 3                            | 7.5                         |
|                                                             |                  | All international land borders are closed (2)               |                              |                             |
|                                                             |                  | Land borders with select countries are closed (1)           |                              |                             |
|                                                             |                  | All land borders are open (0)                               |                              |                             |
| 3. International<br>and domestic<br>sea borders<br>closure  | <b>sea_bord</b>  | All sea borders are closed (3)                              | 3                            | 7.5                         |
|                                                             |                  | All international sea borders are closed (2)                |                              |                             |
|                                                             |                  | Sea borders with select countries are closed (1)            |                              |                             |
|                                                             |                  | All sea borders are open (0)                                |                              |                             |
| 4. Limits on<br>size of social<br>gatherings                | <b>soc_gath</b>  | All social gatherings are prohibited (4)                    | 4                            | 10                          |
|                                                             |                  | Social gatherings of 10 and more people are prohibited (3)  |                              |                             |
|                                                             |                  | Social gatherings of 50 and more people are prohibited (2)  |                              |                             |
|                                                             |                  | Social gatherings of 100 and more people are prohibited (1) |                              |                             |
|                                                             |                  | Social gatherings are not restricted (0)                    |                              |                             |
| 5. Closing of<br>schools                                    | <b>schools</b>   | Full closure of K12 schools (4)                             | 4                            | 10                          |
|                                                             |                  | Partial closure of K12 schools (2)                          |                              |                             |
|                                                             |                  | K12 schools are not required to close (0)                   |                              |                             |
|                                                             | <b>emerg</b>     | State of emergency (3)                                      | 3                            | 7.5                         |

|                                                                 |                 |                                                                 |   |      |
|-----------------------------------------------------------------|-----------------|-----------------------------------------------------------------|---|------|
| 6. State of emergency                                           |                 | No state of emergency (0)                                       |   |      |
| 7. Closure of entertainment venues /stadiums                    | <b>venues</b>   | Closure of entertainment venues /stadiums (1)                   | 1 | 2.5  |
|                                                                 |                 | Entertainment venues /stadiums are not required to close (0)    |   |      |
| 8. Closure of restaurants                                       | <b>restrts</b>  | Restaurants are closed except for take-out and delivery (2)     | 2 | 5    |
|                                                                 |                 | The operation of restaurants is not restricted (0)              |   |      |
| 9. Closure of non-essential businesses                          | <b>ne_busn</b>  | Non-essential businesses are required to close (2)              | 2 | 5    |
|                                                                 |                 | The operation of non-essential businesses is not restricted (0) |   |      |
| 10. Closure of government offices                               | <b>gov_offs</b> | Government offices are closed for public (2)                    | 2 | 5    |
|                                                                 |                 | Government offices are open (0)                                 |   |      |
| 11. Working from home requirement for businesses/org anizations | <b>wfh</b>      | Working from home requirement (1)                               | 1 | 2.5  |
|                                                                 |                 | No working from home requirement (0)                            |   |      |
| 12. Personal mobility restrictions                              | <b>ind_mob</b>  | Residents require a pass to leave home (5)                      | 5 | 12.5 |
|                                                                 |                 | Residents are to stay at home except for essential needs (4)    |   |      |
|                                                                 |                 | Curfew (1)                                                      |   |      |
|                                                                 |                 | No restrictions on leaving home (0)                             |   |      |
| 13. Self-isolation and/or quarantine requirements               | <b>med_stay</b> | Mandatory quarantine for specific categories of residents (3)   | 2 | 5    |
|                                                                 |                 | Quarantine is advised for specific categories of residents (1)  |   |      |
|                                                                 |                 | No policies require quarantine (0)                              |   |      |
| 14. Public transportation closures                              | <b>publ_tr</b>  | Public transportation is closed (2)                             | 2 | 5    |
|                                                                 |                 | The operation of public transportation is not restricted (0)    |   |      |

|                                     |              |                                                    |    |     |
|-------------------------------------|--------------|----------------------------------------------------|----|-----|
| 15. Mandatory wearing of PPE/ masks | <b>masks</b> | Wearing of masks and other PPE is required (2)     | 3  | 7.5 |
|                                     |              | Wearing of masks and other PPE is not required (0) |    |     |
| Total                               |              |                                                    | 40 | 100 |

## S2. List of countries

| #  | Country        | Federal |
|----|----------------|---------|
| 1  | Algeria        |         |
| 2  | Argentina      | Y       |
| 3  | Australia      | Y       |
| 4  | Austria        | Y       |
| 5  | Bangladesh     |         |
| 6  | Belgium        | Y       |
| 7  | Bhutan         |         |
| 8  | Bolivia        |         |
| 9  | Brazil         | Y       |
| 10 | Canada         | Y       |
| 11 | Chile          |         |
| 12 | Colombia       |         |
| 13 | Costa Rica     |         |
| 14 | Croatia        |         |
| 15 | Czech Republic |         |
| 16 | Denmark        |         |
| 17 | Ecuador        |         |
| 18 | Egypt          |         |
| 19 | El Salvador    |         |
| 20 | Finland        |         |
| 21 | France         |         |
| 22 | Germany        | Y       |
| 23 | Guatemala      |         |
| 24 | Honduras       |         |
| 25 | Hungary        |         |
| 26 | India          | Y       |
| 27 | Indonesia      | Y       |
| 28 | Ireland        |         |
| 29 | Israel         |         |
| 30 | Italy          |         |
| 31 | Japan          |         |
| 32 | Jordan         |         |

|    |                      |   |
|----|----------------------|---|
| 33 | Kenya                |   |
| 34 | Kuwait               |   |
| 35 | Lebanon              |   |
| 36 | Malaysia             | Y |
| 37 | Mexico               | Y |
| 38 | Montenegro           |   |
| 39 | Myanmar              |   |
| 40 | Nepal                | Y |
| 41 | Netherlands          |   |
| 42 | New Zealand          |   |
| 43 | Nicaragua            |   |
| 44 | Nigeria              | Y |
| 45 | Norway               |   |
| 46 | Oman                 |   |
| 47 | Pakistan             | Y |
| 48 | Panama               |   |
| 49 | Paraguay             |   |
| 50 | Peru                 |   |
| 51 | Philippines          |   |
| 52 | Poland               |   |
| 53 | Portugal             |   |
| 54 | Qatar                |   |
| 55 | Romania              |   |
| 56 | Russia               | Y |
| 57 | Saudi Arabia         | Y |
| 58 | South Africa         |   |
| 59 | South Korea          |   |
| 60 | Spain                |   |
| 61 | Sri Lanka            |   |
| 62 | Sweden               |   |
| 63 | Switzerland          | Y |
| 64 | Taiwan               |   |
| 65 | Thailand             |   |
| 66 | Turkey               |   |
| 67 | United Arab Emirates |   |
| 68 | United Kingdom       |   |
| 69 | United States        | Y |
| 70 | Uruguay              |   |
| 71 | Venezuela            | Y |
| 72 | Vietnam              |   |
| 73 | Yemen                |   |

### S3. List of included regions by federations

#### **Canada**

CA-AB Alberta

CA-BC British Columbia

CA-MB Manitoba

CA-NB New Brunswick

CA-NL Newfoundland and Labrador

CA-NS Nova Scotia

CA-ON Ontario

CA-PE Prince Edward Island

CA-QC Quebec

CA-SK Saskatchewan

#### **Germany**

DE-BB Brandenburg

DE-BE Berlin

DE-BW Baden-Wurttemberg

DE-BY Bayern

DE-HB Bremen

DE-HE Hessen

DE-HH Hamburg

DE-MV Mecklenburg-Vorpommern

DE-NI Niedersachsen

DE-NW Nordrhein-Westfalen

DE-RP Rheinland-Pfalz

DE-SH Schleswig-Holstein

DE-SL Saarland

DE-SN Sachsen

DE-ST Sachsen-Anhalt

DE-TH Thuringen

**Argentina**

AR-A Salta

AR-B Buenos Aires

AR-C Ciudad Autonoma de Buenos Aires

AR-D San Luis

AR-E Entre Rios

AR-F La Rioja

AR-G Santiago del Estero

AR-H Chaco

AR-J San Juan

AR-K Catamarca

AR-L La Pampa

AR-M Mendoza

AR-N Misiones

AR-P Formosa

AR-Q Neuquen

AR-R Rio Negro

AR-S Santa Fe

AR-T Tucuman

AR-U Chubut

AR-V Tierra del Fuego

AR-W Corrientes

AR-X Cordoba

AR-Y Jujuy

AR-Z Santa Cruz

**India**

IN-AN Andaman and Nicobar Islands

IN-AP Andhra Pradesh

IN-AR Arunachal Pradesh

IN-AS Assam

IN-BR Bihar

IN-CH Chandigarh

IN-CT Chhattisgarh

IN-DH Daman and Diu and Dadra and Nagar Haveli

IN-DL Delhi

IN-GA Goa

IN-GJ Gujarat

IN-HP Himachal Pradesh

IN-HR Haryana

IN-JH Jharkhand



IN-JK Jammu and Kashmir

IN-KA Karnataka

IN-KL Kerala

IN-LA Ladakh

IN-LD Lakshadweep

IN-MH Maharashtra

IN-ML Meghalaya

IN-MN Manipur

IN-MP Madhya Pradesh

IN-MZ Mizoram

IN-NL Nagaland

IN-OR Odisha

IN-PB Punjab

IN-PY Puducherry

IN-RJ Rajasthan

IN-SK Sikkim

IN-TG Telangana

IN-TN Tamil Nadu

IN-TR Tripura

IN-UP Uttar Pradesh

IN-UT Uttarakhand

IN-WB West Bengal

**Australia**

AU-ACT Australian Capital Territory

AU-NSW New South Wales

AU-NT Northern Territory

AU-QLD Queensland

AU-SA South Australia

AU-TAS Tasmania

AU-VIC Victoria

AU-WA Western Australia

**Indonesia**

ID-AC Aceh

ID-BA Bali

ID-BB Kepulauan Bangka Belitung

ID-BE Bengkulu

ID-BT Banten

ID-GO Gorontalo

ID-JA Jambi

ID-JB Jawa Barat

ID-JI Jawa Timur

ID-JK Jakarta Raya

ID-JT Jawa Tengah

ID-KB Kalimantan Barat

ID-KI Kalimantan Timur

ID-KR Kepulauan Riau

ID-KS Kalimantan Selatan  
ID-KT Kalimantan Tengah  
ID-KU Kalimantan Utara  
ID-LA Lampung  
ID-MA Maluku  
ID-MU Maluku Utara  
ID-NB Nusa Tenggara Barat  
ID-NT Nusa Tenggara Timur  
ID-PA Papua  
ID-PB Papua Barat  
ID-RI Riau  
ID-SA Sulawesi Utara  
ID-SB Sumatera Barat  
ID-SG Sulawesi Tenggara  
ID-SN Sulawesi Selatan  
ID-SR Sulawesi Barat  
ID-SS Sumatera Selatan  
ID-ST Sulawesi Tengah  
ID-SU Sumatera Utara  
ID-YO Yogyakarta

**Austria**

AT-1 Burgenland  
AT-2 Karnten

AT-3 Niederosterreich

AT-4 Oberosterreich

AT-5 Salzburg

AT-6 Steiermark

AT-7 Tirol

AT-8 Vorarlberg

AT-9 Wien

**Malaysia**

MY-01 Johor

MY-02 Kedah

MY-03 Kelantan

MY-04 Melaka

MY-05 Negeri Sembilan

MY-06 Pahang

MY-07 Pulau Pinang

MY-08 Perak

MY-09 Perlis

MY-10 Selangor

MY-11 Terengganu

MY-12 Sabah

MY-13 Sarawak

MY-14 Wilayah Persekutuan Kuala Lumpur

MY-15 Wilayah Persekutuan Labuan

MY-16 Wilayah Persekutuan Putrajaya

**Mexico**

MX-AGU Aguascalientes

MX-BCN Baja California

MX-BCS Baja California Sur

MX-CAM Campeche

MX-CHH Chihuahua

MX-CHP Chiapas

MX-CMX Ciudad de Mexico

MX-COA Coahuila de Zaragoza

MX-COL Colima

MX-DUR Durango

MX-GRO Guerrero

MX-GUA Guanajuato

MX-HID Hidalgo

MX-JAL Jalisco

MX-MEX Mexico

MX-MIC Michoacan de Ocampo

MX-MOR Morelos

MX-NAY Nayarit

MX-NLE Nuevo Leon

MX-OAX Oaxaca

MX-PUE Puebla

MX-QUE Queretaro

MX-ROO Quintana Roo

MX-SIN Sinaloa

MX-SLP San Luis Potosi

MX-SON Sonora

MX-TAB Tabasco

MX-TAM Tamaulipas

MX-TLA Tlaxcala

MX-VER Veracruz de Ignacio de la Llave

MX-YUC Yucatan

MX-ZAC Zacatecas

## **Nepal**

NP-P1 Province 1

NP-P2 Province 2

NP-P3 Province 3

NP-P4 Gandaki

NP-P5 Province 5

NP-P6 Karnali

NP-P7 Province 7

## **Belgium**

BE-BRU Bruxelles-Capitale, Region de

BE-VLG Vlaams Gewest

BE-WAL Wallonne, Region

## **Nigeria**

NG-AB Abia

NG-AD Adamawa

NG-AK Akwa Ibom

NG-AN Anambra

NG-BA Bauchi

NG-BE Benue

NG-BO Borno

NG-BY Bayelsa

NG-CR Cross River

NG-DE Delta

NG-EB Ebonyi

NG-ED Edo

NG-EK Ekiti

NG-EN Enugu

NG-FC Abuja Federal Capital Territory

NG-GO Gombe

NG-IM Imo

NG-JI Jigawa

NG-KD Kaduna

NG-KE Kebbi

NG-KN Kano

NG-KO Kogi

NG-KT Katsina

NG-KW Kwara

NG-LA Lagos

NG-NA Nasarawa

NG-NI Niger

NG-OG Ogun

NG-ON Ondo

NG-OS Osun

NG-OY Oyo

NG-PL Plateau

NG-RI Rivers

NG-SO Sokoto

NG-TA Taraba

NG-YO Yobe

NG-ZA Zamfara

**Pakistan**

PK-BA Balochistan

PK-GB Gilgit-Baltistan

PK-IS Islamabad

PK-JK Azad Jammu and Kashmir

PK-KP Khyber Pakhtunkhwa

PK-PB Punjab

PK-SD Sindh



**Russia**

RU-AD Adygeya, Respublika

RU-AL Altay, Respublika

RU-ALT Altayskiy kray

RU-AMU Amurskaya oblast'

RU-ARK Arkhangel'skaya oblast'

RU-AST Astrakhanskaya oblast'

RU-BA Bashkortostan, Respublika

RU-BEL Belgorodskaya oblast'

RU-BRY Bryanskaya oblast'

RU-BU Buryatiya, Respublika

RU-CE Chechenskaya Respublika

RU-CHE Chelyabinskaya oblast'

RU-CHU Chukotskiy avtonomnyy okrug

RU-CU Chuvashskaya Respublika

RU-DA Dagestan, Respublika

RU-IN Ingushetiya, Respublika

RU-IRK Irkutskaya oblast'

RU-IVA Ivanovskaya oblast'

RU-KAM Kamchatskiy kray

RU-KB Kabardino-Balkarskaya Respublika

RU-KC Karachayevo-Cherkesskaya Respublika

RU-KDA Krasnodarskiy kray

RU-KEM Kemerovskaya oblast'  
RU-KGD Kaliningradskaya oblast'  
RU-KGN Kurganskaya oblast'  
RU-KHA Khabarovskiy kray  
RU-KHM Khanty-Mansiyskiy avtonomnyy okrug  
RU-KIR Kirovskaya oblast'  
RU-KK Khakasiya, Respublika  
RU-KL Kalmykiya, Respublika  
RU-KLU Kaluzhskaya oblast'  
RU-KO Komi, Respublika  
RU-KOS Kostromskaya oblast'  
RU-KR Kareliya, Respublika  
RU-KRS Kurskaya oblast'  
RU-KRY Krym, Respublika  
RU-KYA Krasnoyarskiy kray  
RU-LEN Leningradskaya oblast'  
RU-LIP Lipetskaya oblast'  
RU-MAG Magadanskaya oblast'  
RU-ME Mariy El, Respublika  
RU-MO Mordoviya, Respublika  
RU-MOS Moskovskaya oblast'  
RU-MOW Moscow  
RU-MUR Murmanskaya oblast'

RU-NEN Nenetskiy avtonomnyy okrug

RU-NGR Novgorodskaya oblast'

RU-NIZ Nizhegorodskaya oblast'

RU-NVS Novosibirskaya oblast'

RU-OMS Omskaya oblast'

RU-ORE Orenburgskaya oblast'

RU-ORL Orlovskaya oblast'

RU-PER Permskiy kray

RU-PNZ Penzenskaya oblast'

RU-PRI Primorskiy kray

RU-PSK Pskovskaya oblast'

RU-ROS Rostovskaya oblast'

RU-RYA Ryazanskaya oblast'

RU-SA Saha, Respublika

RU-SAK Sakhalinskaya oblast'

RU-SAM Samarskaya oblast'

RU-SAR Saratovskaya oblast'

RU-SE Severnaya Osetiya, Respublika

RU-SEV Sevastopol

RU-SMO Smolenskaya oblast'

RU-SPE Sankt-Peterburg

RU-STA Stavropol'skiy kray

RU-SVE Sverdlovskaya oblast'

RU-TA Tatarstan, Respublika

RU-TAM Tambovskaya oblast'

RU-TOM Tomskaya oblast'

RU-TUL Tul'skaya oblast'

RU-TVE Tverskaya oblast'

RU-TY Tyva, Respublika

RU-TYU Tyumenskaya oblast'

RU-UD Udmurtskaya Respublika

RU-ULY Ul'yanovskaya oblast'

RU-VGG Volgogradskaya oblast'

RU-VLA Vladimirskaya oblast'

RU-VLG Vologodskaya oblast'

RU-VOR Voronezhskaya oblast'

RU-YAN Yamalo-Nenetskiy avtonomnyy okrug

RU-YAR Yaroslavskaya oblast'

RU-YEV Yevreyskaya avtonomnaya oblast'

RU-ZAB Zabaykal'skiy kray

### **South Africa**

ZA-EC Eastern Cape

ZA-FS Free State

ZA-GP Gauteng

ZA-KZN Kwazulu-Natal

ZA-LP Limpopo

ZA-MP Mpumalanga

ZA-NC Northern Cape

ZA-NW North-West

ZA-WC Western Cape

**Switzerland**

CH-AG Aargau

CH-AI Appenzell Innerrhoden

CH-AR Appenzell Ausserrhoden

CH-BE Bern

CH-BL Basel-Landschaft

CH-BS Basel-Stadt

CH-FR Freiburg

CH-GE Geneve

CH-GL Glarus

CH-GR Grisons

CH-JU Jura

CH-LU Luzern

CH-NE Neuchatel

CH-NW Nidwalden

CH-OW Obwalden

CH-SG Sankt Gallen

CH-SH Schaffhausen

CH-SO Solothurn

CH-SZ Schwyz

CH-TG Thurgau

CH-TI Ticino

CH-UR Uri

CH-VD Vaud

CH-VS Wallis

CH-ZG Zug

CH-ZH Zurich

**Brazil**

BR-AC Acre

BR-AL Alagoas

BR-AM Amazonas

BR-AP Amapa

BR-BA Bahia

BR-CE Ceara

BR-DF Distrito Federal

BR-ES Espirito Santo

BR-GO Goias

BR-MA Maranhao

BR-MG Minas Gerais

BR-MS Mato Grosso do Sul

BR-MT Mato Grosso

BR-PA Para

BR-PB Paraiba

BR-PE Pernambuco

BR-PI Piaui

BR-PR Parana

BR-RJ Rio de Janeiro

BR-RN Rio Grande do Norte

BR-RO Rondonia

BR-RR Roraima

BR-RS Rio Grande do Sul

BR-SC Santa Catarina

BR-SE Sergipe

BR-SP Sao Paulo

BR-TO Tocantins

**United States**

US-AK Alaska

US-AL Alabama

US-AR Arkansas

US-AZ Arizona

US-CA California

US-CO Colorado

US-CT Connecticut

US-DE Delaware

US-FL Florida

US-GA Georgia  
US-HI Hawaii  
US-IA Iowa  
US-ID Idaho  
US-IL Illinois  
US-IN Indiana  
US-KS Kansas  
US-KY Kentucky  
US-LA Louisiana  
US-MA Massachusetts  
US-MD Maryland  
US-ME Maine  
US-MI Michigan  
US-MN Minnesota  
US-MO Missouri  
US-MS Mississippi  
US-MT Montana  
US-NC North Carolina  
US-ND North Dakota  
US-NE Nebraska  
US-NH New Hampshire  
US-NJ New Jersey  
US-NM New Mexico



US-NV Nevada

US-NY New York

US-OH Ohio

US-OK Oklahoma

US-OR Oregon

US-PA Pennsylvania

US-RI Rhode Island

US-SC South Carolina

US-SD South Dakota

US-TN Tennessee

US-TX Texas

US-UT Utah

US-VA Virginia

US-VT Vermont

US-WA Washington

US-WI Wisconsin

US-WV West Virginia

US-WY Wyoming

**Venezuela**

VE-A Distrito Capital

VE-B Anzoategui

VE-C Apure

VE-D Aragua

VE-E Barinas  
VE-F Bolivar  
VE-G Carabobo  
VE-H Cojedes  
VE-I Falcon  
VE-J Guarico  
VE-K Lara  
VE-L Merida  
VE-M Miranda  
VE-N Monagas  
VE-O Nueva Esparta  
VE-P Portuguesa  
VE-R Sucre  
VE-S Tachira  
VE-T Trujillo  
VE-U Yaracuy  
VE-V Zulia  
VE-W Dependencias Federales  
VE-X Vargas  
VE-Y Delta Amacuro  
VE-Z Amazonas

#### S4. Electoral timing, diffusion of accountability, and partisanship variables

##### Institutions affecting short-term electoral risks to the federal executive

| Federation    | Months to next scheduled election of the federal executive* | Type of government (1 for presidential) | Number of parties in the federal executive | Effective number of legislative parties |
|---------------|-------------------------------------------------------------|-----------------------------------------|--------------------------------------------|-----------------------------------------|
| United States | 7                                                           | 1                                       | 1                                          | 2.0                                     |
| Germany       | 18                                                          | 0                                       | 2                                          | 5.6                                     |
| Nepal         | 20                                                          | 0                                       | 1                                          | 1.5                                     |
| Australia     | 29                                                          | 0                                       | 3                                          | 3.2                                     |
| Brazil        | 30                                                          | 1                                       | 1                                          | 10.4                                    |
| Nigeria       | 34                                                          | 1                                       | 1                                          | 2.1                                     |
| Malaysia      | 41                                                          | 0                                       | 4                                          | 6.9                                     |
| Argentina     | 42                                                          | 1                                       | 1                                          | 2.3                                     |
| Canada        | 42                                                          | 0                                       | 1                                          | 2.8                                     |
| Pakistan      | 42                                                          | 0                                       | 6                                          | 3.6                                     |
| Switzerland   | 42                                                          | 0                                       | 4                                          | 5.8                                     |
| Austria       | 44                                                          | 0                                       | 2                                          | 3.9                                     |
| South Africa  | 44                                                          | 0                                       | 1                                          | 2.6                                     |
| Venezuela     | 44                                                          | 1                                       | 1                                          | 1.8                                     |
| Russia        | 47                                                          | 1                                       | 1                                          | 1.7                                     |
| India         | 48                                                          | 0                                       | 5                                          | 3                                       |
| Indonesia     | 48                                                          | 1                                       | 1                                          | 7.5                                     |
| Belgium       | 49                                                          | 0                                       | 3                                          | 9.7                                     |
| Mexico        | 51                                                          | 1                                       | 1                                          | 4.7                                     |

Note: \*presidential if available, otherwise parliamentary

## S5. Exploring the role of partisanship of the federal executive

Table S5.1 Parties of Prime Minister or President on March 15 2020 on the Left-Right

### Economic Dimension

|    |                 | Party name                                             | Economic scale<br>from 1 (Left) to<br>6 (Right) |
|----|-----------------|--------------------------------------------------------|-------------------------------------------------|
| 1  | Argentina       | Frente Justicialista-Justicialist [Peronist]<br>Party  | 2                                               |
| 2  | Australia       | Liberal Party of Australia                             | 4                                               |
| 3  | Austria         | Austrian People's Party                                | 4                                               |
| 4  | Belgium         | Reformist Movement                                     | 4                                               |
| 5  | Brazil          | Social Liberal Party                                   | 5                                               |
| 6  | Canada          | Liberal Party of Canada                                | 2                                               |
| 7  | Germany         | Christian Democratic Union                             | 4                                               |
| 8  | India           | Indian People's Party                                  | 5                                               |
| 9  | Indonesia       | Indonesian Democratic Party of Struggle                | 2                                               |
| 10 | Malaysia        | Malaysian United Indigenous Party                      | 2                                               |
| 11 | Mexico          | National Regeneration Movement                         | 1                                               |
| 12 | Nepal           | Communist Party of Nepal (Unified<br>Marxist–Leninist) | 3                                               |
| 13 | Nigeria         | All Progressives Congress                              | 2                                               |
| 14 | Pakistan        | Pakistan Movement for Justice                          | 4                                               |
| 15 | Russia          | United Russia                                          | 3                                               |
| 16 | South<br>Africa | African National Congress                              | 2                                               |
| 17 | Venezuela       | United Socialist Party of Venezuela                    | 1                                               |
| 18 | USA             | Republican Party                                       | 5                                               |

Note: Switzerland is not included because of its institution of multi-party presidency

Source: Computed for 2020 by the authors based on Lührmann et al. 2020; varname:  
[v2pariglef]

Partisanship of the national incumbent might influence her accountability for health versus disruption because of the preferences of her partisan core constituencies. Figure A3.1 roughly explores this potential influence on the national role in total COVID-19 mitigation policy stringency. It reports distributions of National to Total Average PPIs given the bloc-partisanship of the head of the executive (a president or a prime-minister). Here we use the head of the executive's individual party affiliation as a measure of the policy-maker's partisanship. There are other actors in government of course. Our approach reflects the preponderance of policy measures of executive origin in COVID onset period. While some of the policies were attributable to the legislative and judicial branches and to professional bureaucracy, those were much fewer and/or specific to only a few countries (see Adeel et al. 2020). Limited sample size forces us to focus on what was likely the most pertinent partisanship influence.

We use the block partisanship approach (parties grouped in binary blocks as defined by Bartolini and Mair 2007), for the same reason of the sample size being so limited. We identify the block partisanship of the head of the executive from the party position on the left-right economic cleavage, as coded by us for April 1 2020 using the methodology in Lührmann et al. (2020). For the binary block partisanship measure, we code parties scoring from 1 to 3 on the six-point economic scale as Left, and from 4 to 6 – as Right.<sup>1</sup> The sample splits almost evenly, with 10 national incumbents in Left block, and 8 in the Right. Switzerland is not included in Figure A3.1, because of its institution of multiparty national presidency.

---

<sup>1</sup> This economic policy coding roughly corresponds to the main for Bartolini and Mair (2007 p. 46), class cleavage conceptualization of party blocks for Europe.

Figure S5.1 Block Partisanship of the Head of the Executive and the Box-plot of the Ratio of Federal to Average Total PPI

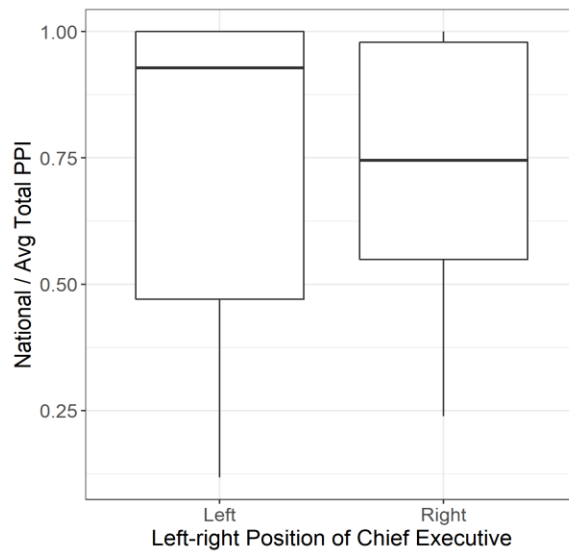

Note: Excludes Switzerland

While Figure A4.1 is by no means a definitive answer, the evidence suggests that Left incumbents involved national governments in the painful COVID-19 mitigation policy making to a much larger degree than did their Right counterparts. Figure A3.1 further explores this query, by splitting heads on national executives into three groups: Left (1-2), Center (3-4) and Right (5-6). The indications of increasing federal involvement when moving left on the political spectrum only strengthens further, offering promising possibilities for future research on a larger sample.

Partisanship matters for the health accountability, too, but only when people do know who to blame. Malhotra and Kuo (2008) find that, even though “partisan cues cause individuals to blame officials of the opposite party, but citizens make more principled judgments when provided with information about officials’ responsibilities.” Our operationalization of duty to safeguard public health across levels of government, as described in the following section could be combined, in future research, with more refined partisanship data, to explore the impact of

party congruence between the levels on the incumbents ability to coordinate in who leads on policy-making, as well as the role of the opposition and cross-bloc coalitions in increasing crisis response effectiveness.

Figure S5.2 Tri-Block Partisanship of the Head of the Executive and the Box-plot of the ratio of Federal to Average Total PPI

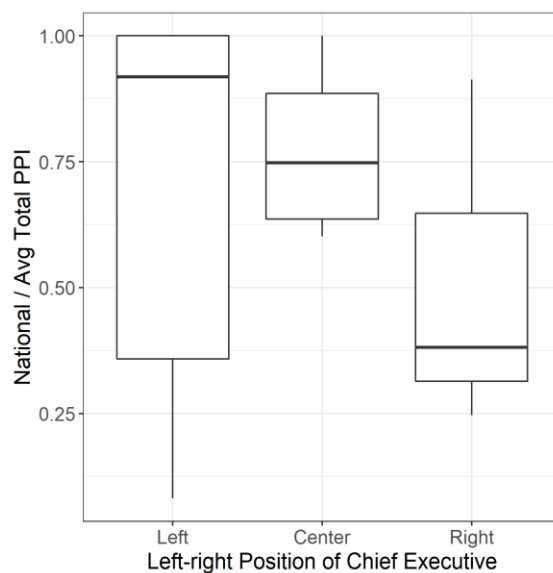

## S6. Operationalizing the balance of accountability for health on the basis of the decision space methodology

Where decision space methodology produces complex multidimensional characterizations of the institutions of health, we are looking for a linear typology, so to collapse decision space framework onto the dimensions of the duty of care and the magnitude of involvement. We operationalize our first variable, which in a broader sample is labeled the duty-of care, is based on two input variables, each in turn a compound indicator mapped from the decision-space matrix. The first is *primary care government level* (does not vary in our current

sample and thus omitted in the discussion). The second is *Federal Government's Accountability for Health*. Both are coded from the decision-space indicators listed in Table S6.1.

*Dominant level /decisive role for public primary care provision from among governments: dominant\_level of provision* is the process variable capturing where most of the observed government participation in actual health delivery takes place -- the level of government most visibly responsible for the government primary health care provision. This indicator does not vary in our federal sample – federal level is not dominant in any of our included cases. We nonetheless report this variable here because the variation is present in the full global sample and the indicator thus needs to be included in subsequent research.

*Federal constitution takes responsibility for health*: coded as Y (for “yes”), if the constitution mentions health as a right and/or explicitly gives the federal government any responsibility for health. Note that the Australian constitution does explicitly give the responsibility for health, but to state governments.

*Federal role in all government only financing of health*: This variable is coded as H (for high) if federal level bears over 50 percent of all government health care expenses. Again, social schemes and compulsory insurance schemes are not included, even though they are customarily recorded in the “public” financing category in the data sources. This is driven by the theoretical conceptualization: sickness funds’ performance is not blamed on the political incumbents short to medium term agency other than via legislative and regulatory oversight.

*Government role in health care*: Unlike the customary “public” sector indicators, we are identifying ONLY government funding based on government-received fiscal revenue (i.e., excludes Medicare tax in the US). Social schemes and compulsory insurance schemes are not included, even where they are funded via direct payroll deductions. This distinction is theory-



driven, since our focus is on incumbents' incentives to abstain or engage in public health policy-making due to their direct individual accountability. Elected politicians do not have immediate agency in the operation of social schemes and compulsory insurance. While they are indirectly connected to those via legislative and regulatory oversight, this connection is distant.

*Government share* indicator takes the value of H when total (from all levels of government share of spending on health exceeds 45 percent, L when it is below 45 percent.

Table S6.1. Decision space indicators with implications for incumbents' long term accountability for the outcome of the pandemic

|               | Federal constitution takes responsibility for health | Share of federal government in all government financing of health | Dominant level/decisive role for public primary care <u>provision</u> | <u>Government role</u> / share of funding of health care |
|---------------|------------------------------------------------------|-------------------------------------------------------------------|-----------------------------------------------------------------------|----------------------------------------------------------|
| Argentina**   | Y                                                    | Low                                                               | Provinces                                                             | High                                                     |
| Australia**   | No***                                                | High                                                              | States/ local                                                         | High                                                     |
| Austria**     | Y                                                    | Low                                                               | Lander                                                                | Low                                                      |
| Belgium**     | Y                                                    | Low                                                               | Local                                                                 | Low                                                      |
| Brazil*       | Y                                                    | Low                                                               | Municipal                                                             | High                                                     |
| Canada*       | No                                                   | Low                                                               | Provinces                                                             | High                                                     |
| Germany*      | No                                                   | High                                                              | Lander                                                                | Low                                                      |
| India**       | Y                                                    | Low                                                               | States                                                                | Low                                                      |
| Indonesia**   | Y                                                    | Low                                                               | Provincial and municipal                                              | Low                                                      |
| Malaysia**    | Y                                                    | High                                                              | States                                                                | High                                                     |
| Mexico*       | Y                                                    | High                                                              | States                                                                | High                                                     |
| Nepal**       | Y                                                    | High                                                              | State and municipal                                                   | Low                                                      |
| Nigeria*      | Y                                                    | High                                                              | Subnational                                                           | Low                                                      |
| Pakistan*     | No                                                   | Low                                                               | Provinces                                                             | Low                                                      |
| Russia**      | Y                                                    | Low                                                               | Regions                                                               | High                                                     |
| South Africa* | Y                                                    | High                                                              | Provinces                                                             | High                                                     |
| Switzerland*  | N                                                    | Low                                                               | Cantons or below                                                      | Low                                                      |
| Venezuela***  | Y                                                    | Low                                                               | subnational                                                           | Low                                                      |
| USA**         | No                                                   | High                                                              | States                                                                | Low                                                      |

Note: Government role coding of funding of health care in the US includes Medicaid but excludes Medicare.

\*Sources: from Marchildon, G.P. and Bossert, T.J. eds., 2018. *Federalism and decentralization in health care: a decision space approach*. University of Toronto Press.

\*\*Sources: Coded by us according to Marchildon, G.P. and Bossert, T.J. eds., 2018. *Federalism and decentralization in health care: a decision space approach*. University of Toronto Press and Bossert, T.J., 2014. Empirical studies of an approach to decentralization: "decision space" in decentralized health systems. *Public Adm Dev*, 26(4), pp.303-315. For countries: Argentina: "Government . . ." 2018; "Argentina . . ." 2019; Palacios et al (2020);

Austria: Bachner et al. (2018); Belgium: Gerkens and Merkur (2010), Schokkaert et al (2011); India: Balarajan (2011); Gupta 2020, Seshadri et al. (2016), Singh (2008); Indonesia: Miharti et al. (2016) Rakmawati et al (2019), Sparrow et al. (2017), Suryanto et al. (2016); Malaysia: Chee (2008), Chua and Cheah (2012), Robinson et al. (2020); Nigeria: Anifalaje (2009); Venezuela: Daryanani (2017); Russia: Danishevski et al. 2006, Marten et al. 2014, Popovich et al. 2011.

\*\*\* Federal Constitution in Australia not only does not assign the National government the responsibility for health, but it specifically assigns that responsibility to States.

Figure S6.1 shows the construction of the *Federal Government's Accountability for Health* variable used in the main analysis and breaks down our sample accordingly.

*Constitutional assignment to federal* together with *financial role of federal* determines the placement of a federation in one of the four categories on this dimension capturing the duty of care of the federal level of government.

Figure S6.1. *Federal Government's Accountability for Health*

|                                                    |      | <i>Constitutional assignment (to federal)</i>                                          |                                       |
|----------------------------------------------------|------|----------------------------------------------------------------------------------------|---------------------------------------|
|                                                    |      | Yes                                                                                    | No                                    |
| <i>Federal role in government health financing</i> | high | Malaysia<br>Mexico<br>Nepal<br>Nigeria<br>South Africa                                 | Australia<br>Germany<br>United States |
|                                                    | low  | Argentina<br>Austria<br>Belgium<br>Brazil<br>India<br>Indonesia<br>Russia<br>Venezuela | Canada<br>Pakistan<br>Switzerland     |

Values for *Federal Government's Accountability for Health* are further recorded according to the following scheme:

The top-left quadrant (in green) is high likelihood of *Federal Government's Accountability for Health*; the bottom-left quadrant (in blue) is medium-high; the top-right quadrant (in yellow), is medium-low, reflecting our premise that constitutional mandate is of

greater consequence for the voters' perception of the duty of the federal government in health than the fiscal transfers from it to subnational governments; the bottom right quadrant (in gray) is where the likelihood of *Federal Government's Accountability for Health* is Low. These values of likelihood of *Federal Government's Accountability for Health* are subsequently reflected in Figure 9 in the essay as column headings.
